# Supplementary material for: Individual Innovativeness Levels and Levels of Medical Artificial Intelligence Readiness Among Nursing Students: a Cross-sectional and Correlational Study
Source: Research Square preprint supplement (doi:10.21203/rs.3.rs-6472068/v1), 2025-05-19
Supplement: Supplementary file 1 [file e7136fa404a7bf8da40d7998.docx]

**Table 1.** Distribution of Demographic Characteristics of Nursing Students(n=781)

| **Descriptive Features** | | **Mean±SD** | |
| --- | --- | --- | --- |
| **Age** |  | 21.23±1.79 | |
|  | **Sayı** | **%** |
| **Gender** | Woman | 602 | 77.1 |
| Male | 179 | 22.9 |
| Total | 781 | 100.0 |
| **Class** | Grade 1 | 200 | 25.6 |
| Grade 2 | 193 | 24.7 |
| Grade 3 | 193 | 24.7 |
| Grade 4 | 195 | 25.0 |
| Total | 781 | 100.0 |
| **Academic Mean** | 2-2.5 | 25 | 3.2 |
| 2.5-3 | 191 | 24.5 |
| 3-3.5 | 474 | 60.7 |
| 3.5-4 | 91 | 11.7 |
| Total | 781 | 100.0 |
| **Information about Artificial Intelligence** | I have information | 111 | 14.2 |
| I have partial knowledge | 545 | 69.8 |
| No Information | 125 | 16.0 |
| Total | 781 | 100.0 |
| **Program Information Developed with Artificial Intelligence** | I have information | 72 | 9.2 |
| I have partial knowledge | 462 | 59.2 |
| No Information | 247 | 31.6 |
| Total | 781 | 100.0 |
| **Using Artificial Intelligence in Healthcare** | I have information | 65 | 8.3 |
| I have partial knowledge | 436 | 55.8 |
| No Information | 280 | 35.9 |
| Total | 781 | 100.0 |
| **Feeling Open to Innovation** | Yes | 681 | 87.2 |
| No | 100 | 12.8 |
| Total | 781 | 100.0 |
| **Use of Artificial Intelligence** | I am using | 240 | 30.7 |
| I do not use | 165 | 21.1 |
| I don't know | 376 | 48.1 |
| Total | 781 | 100.0 |

**Table 2.** Distribution of Students' Individual Innovativeness Scale and Medical Artificial Intelligence Readiness Scale Mean Scores

|  | N | Minimum | Maximum | Mean | Std. Deviation | Cronbach-a |
| --- | --- | --- | --- | --- | --- | --- |
| **Individual Innovativeness Scale Total Score** | 781 | 18.00 | 90.00 | 55.09 | 9.22 | 0.84 |
| Opinion Leadership Subscale Score | 781 | 7.00 | 35.00 | 23.08 | 5.45 | 0.891 |
| Resistance to Change Subdimension Score | 781 | 7.00 | 35.00 | 17.63 | 4.92 | 0.776 |
| Risk Taking Subscale Score | 781 | 4.00 | 20.00 | 14.38 | 3.06 | 0.779 |
| **Medical AI Readiness Scale Total Score** | 781 | 40.00 | 110.00 | 67.63 | 12.83 | 0.958 |
| Cognitive Subscale Score | 781 | 10.00 | 40.00 | 22.17 | 5.52 | 0.913 |
| Skill Subscale Score | 781 | 14.00 | 40.00 | 26.66 | 5.29 | 0.945 |
| Foresight Subscale Score | 781 | 3.00 | 15.00 | 9.21 | 2.17 | 0.892 |
| Ethics Subdimension Score | 781 | 3.00 | 15.00 | 9.58 | 2.78 | 0.873 |

**Table 3.** Correlation Table between Individual Innovativeness Scale and Medical Artificial Intelligence Readiness Scale Total and Subscale Scores

| **Correlations** | | | | | | | | | | |
| --- | --- | --- | --- | --- | --- | --- | --- | --- | --- | --- |
|  | **Pearson r ve p value** | **Individual Innovativeness Scale Total Mean Score** | **Mean Opinion Leadership Subscale Scores** | **Resistance to Change Subdimension Mean Score** | **Risk Taking Subscale Mean Score** | **Medical Artificial Intelligence Readiness Scale Total Mean Score** | **Cognitive Subdimension Mean Score** | **Skill Subscale Mean Score** | **Foresight Subscale Mean Score** | **Ethics Subdimension Mean Score** |
| **Individual Innovativeness Scale Total Mean Score** | r | 1 | ,828** | ,495** | ,740** | ,172** | ,210** | -,067 | ,152** | ,384** |
| p |  | ,000 | ,000 | ,000 | ,000 | ,000 | ,061 | ,000 | ,000 |
| N | 781 | 781 | 781 | 781 | 781 | 781 | 781 | 781 | 781 |
| **Mean Opinion Leadership Subscale Scores** | r | ,828** | 1 | -,026 | ,752** | ,467** | ,434** | ,296** | ,379** | ,434** |
| p | ,000 |  | ,461 | ,000 | ,000 | ,000 | ,000 | ,000 | ,000 |
| N | 781 | 781 | 781 | 781 | 781 | 781 | 781 | 781 | 781 |
| **Resistance to Change Subdimension Mean Score** | r | ,495** | -,026 | 1 | -,069 | -,473** | -,288** | -,662** | -,336** | -,087* |
| p | ,000 | ,461 |  | ,052 | ,000 | ,000 | ,000 | ,000 | ,015 |
| N | 781 | 781 | 781 | 781 | 781 | 781 | 781 | 781 | 781 |
| **Risk Taking Subscale Mean Score** | r | ,740** | ,752** | -,069 | 1 | ,444** | ,322** | ,334** | ,322** | ,523** |
| p | ,000 | ,000 | ,052 |  | ,000 | ,000 | ,000 | ,000 | ,000 |
| N | 781 | 781 | 781 | 781 | 781 | 781 | 781 | 781 | 781 |
| **Medical Artificial Intelligence Readiness Scale Total Mean Score** | r | ,172** | ,467** | -,473** | ,444** | 1 | ,836** | ,860** | ,755** | ,730** |
| p | ,000 | ,000 | ,000 | ,000 |  | ,000 | ,000 | ,000 | ,000 |
| N | 781 | 781 | 781 | 781 | 781 | 781 | 781 | 781 | 781 |
| **Cognitive Subdimension Mean Score** | r | ,210** | ,434** | -,288** | ,322** | ,836** | 1 | ,539** | ,532** | ,428** |
| p | ,000 | ,000 | ,000 | ,000 | ,000 |  | ,000 | ,000 | ,000 |
| N | 781 | 781 | 781 | 781 | 781 | 781 | 781 | 781 | 781 |
| **Skill Subscale Mean Score** | r | -,067 | ,296** | -,662** | ,334** | ,860** | ,539** | 1 | ,558** | ,558** |
| p | ,061 | ,000 | ,000 | ,000 | ,000 | ,000 |  | ,000 | ,000 |
| N | 781 | 781 | 781 | 781 | 781 | 781 | 781 | 781 | 781 |
| **Foresight Subscale Mean Score** | r | ,152** | ,379** | -,336** | ,322** | ,755** | ,532** | ,558** | 1 | ,584** |
| p | ,000 | ,000 | ,000 | ,000 | ,000 | ,000 | ,000 |  | ,000 |
| N | 781 | 781 | 781 | 781 | 781 | 781 | 781 | 781 | 781 |
| **Ethics Subdimension Mean Score** | r | ,384** | ,434** | -,087* | ,523** | ,730** | ,428** | ,558** | ,584** | 1 |
| p | ,000 | ,000 | ,015 | ,000 | ,000 | ,000 | ,000 | ,000 |  |
| N | 781 | 781 | 781 | 781 | 781 | 781 | 781 | 781 | 781 |
| **. Correlation is significant at the 0.01 level (2-tailed). | | | | | | | | | | |
| *. Correlation is significant at the 0.05 level (2-tailed). | | | | | | | | | | |

**Table 4.** Comparison of Individual Innovativeness Scale and Medical Artificial Intelligence Readiness Scale Scale Scores According to Demographic Characteristics of Students

|  |  |  | **Individual Innovativeness Scale Total Mean Score** | **Mean Opinion Leadership Subscale Scores** | **Resistance to Change Subdimension Mean Score** | **Risk Taking Subscale Mean Score** | **Medical Artificial Intelligence Readiness Scale Total Mean Score** | **Cognitive Subdimension Mean Score** | **Skill Subscale Mean Score** | **Foresight Subscale Mean Score** | **Ethics Subdimension Mean Score** |
| --- | --- | --- | --- | --- | --- | --- | --- | --- | --- | --- | --- |
|  |  | N | Mean±SS | Mean±SS | Mean±SS | Mean±SS | Mean±SS | Mean±SS | Mean±SS | Mean±SS | Mean±SS |
| **Gender** | **Woman** | 602 | 54.52±9.32 | 22.71±5.57 | 17.53±4.83 | 14.28±3.10 | 66.91±12.66 | 21.70±5.53 | 26.63±5.11 | 9.09±2.15 | 9.49±2.84 |
| **Male** | 179 | 57.03±8.62 | 24.31±4.90 | 17.98±5.23 | 14.74±2.92 | 70.10±13.16 | 23.78±5.20 | 26.80±5.89 | 9.65±2.21 | 9.88±2.56 |
| **Test** | | **t=-3.223 p=.001** | **t=-3.476 p=.001** | t=-.078 p=.282 | t=-1.766 p=.078 | **t=-2.936 p=.003** | **t=-4.474 p=.001** | t=-.354 p=.723 | **t=-3.024 p=.003** | t=-1.629 p=.104 |
| **Class** | **Grade 1** | 200 | 55.12±9.25 | 23.20±5.47 | 17.29±5.11 | 14.64±2.86 | 70.67±12.74 | 23.25±5.43 | 28.12±4.91 | 9.52±2.18 | 9.78±2.77 |
| **Grade 2** | 193 | 51.51±8.05 | 21.47±4.73 | 16.68±4.91 | 13.36±2.73 | 68.92±12.17 | 22.44±4.96 | 27.61±4.92 | 9.31±2.11 | 9.56±2.90 |
| **Grade 3** | 193 | 55.26±9.66 | 23.17±5.60 | 17.81±4.99 | 14.29±3.20 | 66.79±11.34 | 22.31±5.60 | 26.24±4.57 | 9.05±2.00 | 9.19±2.52 |
| **Grade 4** | 195 | 58.45±8.57 | 24.47±5.60 | 18.76±4.46 | 15.23±3.16 | 64.11±14.06 | 20.68±5.79 | 24.67±6.00 | 8.98±2.36 | 9.78±2.89 |
| **Total** | 781 | 55.09±9.22 | 23.08±5.46 | 17.64±4.92 | 14.38±3.06 | 67.64±12.84 | 22.17±5.52 | 26.67±5.29 | 9.22±2.17 | 9.58±2.78 |
| **Test** | | **F=22.541240 p=.001** | **F=10.135677 p=.001** | **F=6.319413 p=.001** | **F=13.246827 p=.001** | **F=9.853312 p=.001** | **F=7.621059 p=.001** | **F=15.675410 p=.001** | F=2.544558 p=.055 | F=1.975838 p=.116 |
| **Academic Mean** | **2-2.5** | 25 | 52.36±13.04 | 23.32±7.78 | 15.52±4.10 | 13.52±4.77 | 69.72±12.63 | 23.88±5.49 | 27.52±4.21 | 10.16±2.01 | 8.16±2.13 |
| **2.5-3** | 191 | 55.31±8.77 | 22.18±4.91 | 18.72±5.20 | 14.41±2.74 | 65.78±13.32 | 21.78±5.49 | 25.72±5.36 | 9.00±2.36 | 9.28±3.10 |
| **3-3.5** | 474 | 54.87±9.17 | 23.35±5.52 | 17.23±4.80 | 14.30±3.10 | 68.05±12.51 | 22.10±5.56 | 26.87±5.29 | 9.31±2.10 | 9.77±2.64 |
| **3.5-4** | 91 | 56.57±9.06 | 23.52±5.37 | 18.05±4.77 | 15.00±2.88 | 68.84±13.32 | 22.90±5.35 | 27.36±5.25 | 8.95±2.12 | 9.63±2.85 |
| **Total** | 781 | 55.09±9.22 | 23.08±5.46 | 17.64±4.92 | 14.38±3.06 | 67.64±12.84 | 22.17±5.52 | 26.67±5.29 | 9.22±2.17 | 9.58±2.78 |
| **Test** | | F=1.639326 p=.179 | F=2.642 p=.054 | **F=6.058551 p=.001** | F=1.740 p=.164 | F=1.985541 p=.115 | F=1.674444 p=.171 | **F=3.060 p=.032** | **F=2.990063 p=.03** | **F=3.649802 p=.012** |
| **Information about Artificial Intelligence** | **I have information** | 111 | 59.03±10.55 | 27.09±5.54 | 15.68±6.26 | 16.26±2.76 | 80.52±13.43 | 27.54±5.97 | 31.35±5.26 | 10.41±2.22 | 11.23±2.53 |
| **I have partial knowledge** | 545 | 54.86±8.14 | 22.88±4.88 | 17.58±4.57 | 14.41±2.66 | 67.18±11.21 | 21.71±4.88 | 26.69±4.71 | 9.18±2.08 | 9.60±2.66 |
| **No Information** | 125 | 52.6±11.17 | 20.41±5.83 | 19.62±4.34 | 12.58±3.84 | 58.21±9.27 | 19.42±4.63 | 22.40±4.07 | 8.34±2.07 | 8.05±2.67 |
| **Total** | 781 | 55.09±9.22 | 23.08±5.46 | 17.64±4.92 | 14.38±3.06 | 67.64±12.84 | 22.17±5.52 | 26.67±5.29 | 9.22±2.17 | 9.58±2.78 |
| **Test** | | **F=10.992094 p=.001** | **F= 51.115880 p=.001** | **F=19.763517 p=.001** | **F=47.485932 p=.001** | **F=116.668 p=.001** | **F=84.777279 p=.001** | **F=106.876676 p=.001** | **F=28.859 p=.001** | **F=42.471395 =.001** |
| **Program Information Developed with Artificial Intelligence** | **I have information** | 72 | 62±11.33 | 28.96±5.74 | 16.25±7.01 | 16.79±3.09 | 81.67±14.72 | 28.60±7.06 | 31.11±5.49 | 10.51±2.40 | 11.44±2.62 |
| **I have partial knowledge** | 462 | 55.3±7.85 | 23.49±4.49 | 17.02±4.64 | 14.80±2.52 | 69.19±11.90 | 22.34±5.00 | 27.54±5.03 | 9.42±2.09 | 9.89±2.71 |
| **No Information** | 247 | 52.7±9.86 | 20.61±5.54 | 19.20±4.31 | 12.90±3.30 | 60.66±9.14 | 20.00±4.32 | 23.74±4.13 | 8.46±2.00 | 8.46±2.52 |
| **Total** | 781 | 55.09±9.22 | 23.08±5.46 | 17.64±4.92 | 14.38±3.06 | 67.64±12.84 | 22.17±5.52 | 26.67±5.29 | 9.22±2.17 | 9.58±2.78 |
| **Test** | | **F=20.641706 p=.001** | **F=63.936794 p=.001** | **F=21.270453 p=.001** | **F=51.962942 p=.001** | **F=99.218589 p=.001** | **F=57.122565 p=.001** | **F=88.713412 p=.001** | **F=30.286368 p=.001** | **F=45.308218 p=.001** |
| **Using Artificial Intelligence in Healthcare** | **I have information** | 65 | 60.04±12.31 | 28.09±6.08 | 15.15±6.38 | 16.80±3.40 | 82.74±14.63 | 28.02±7.38 | 32.18±5.26 | 10.82±2.82 | 11.72±3.06 |
| **I have partial knowledge** | 436 | 55.9±7.97 | 23.77±4.69 | 17.31±4.74 | 14.83±2.56 | 69.07±12.04 | 22.67±5.11 | 27.21±5.02 | 9.40±1.98 | 9.80±2.68 |
| **No Information** | 280 | 52.7±9.57 | 20.85±5.38 | 18.73±4.54 | 13.13±3.18 | 61.91±9.80 | 20.05±4.39 | 24.54±4.53 | 8.57±2.06 | 8.75±2.53 |
| **Total** | 781 | 55.09±9.22 | 23.08±5.46 | 17.64±4.92 | 14.38±3.06 | 67.64±12.84 | 22.17±5.52 | 26.67±5.29 | 9.22±2.17 | 9.58±2.78 |
| **Test** | | **F=16.157368 p=.001** | **F=50.744221 p=.001** | **F=13.711327 p=.001** | **F=44.075670 p=.001** | **F=80.291266 p=.001** | **F=51.181344 p=.001** | **F=68.125820 p=.001** | **F=25.682890 p=.001** | **F=32.016203 p=.001** |
| **Feeling Open to Innovation** | **Yes** | 681 | 56.08±8.59 | 24.01±4.86 | 17.29±4.93 | 14.79±2.83 | 69.41±12.25 | 22.79±5.41 | 27.36±5.12 | 9.43±2.12 | 9.84±2.66 |
| **No** | 100 | 48.36±10.53 | 16.76±5.10 | 19.97±4.25 | 11.63±3.22 | 55.55±9.93 | 18.00±4.40 | 21.95±3.86 | 7.80±1.98 | 7.80±2.93 |
| **Test** | | **t= 8.147 p=.001** | **t=13.833 p=.001** | **t= -5.760 p=.001** | **t= 10.243 p=.001** | **t= 10.807 p=.001** | **t= 8.450 p=.001** | **t= 10.143 p=.001** | **t= 7.216 p=.001** | **t= 6.573 p=.001** |
| **Use of Artificial Intelligence** | **I am using** | 240 | 56.75±8.70 | 25.12±5.04 | 16.50±5.39 | 15.14±2.91 | 74.75±12.99 | 25.30±5.52 | 29.25±5.07 | 10.01±2.05 | 10.19±2.83 |
| **I do not use** | 165 | 54.48±8.73 | 22.31±4.59 | 18.17±4.82 | 14.01±2.71 | 65.54±10.23 | 21.87±4.67 | 25.86±4.20 | 8.95±2.10 | 8.86±2.55 |
| **I don't know** | 376 | 54.31±9.64 | 22.12±5.72 | 18.13±4.54 | 14.07±3.22 | 64.02±11.92 | 20.31±4.97 | 25.37±5.29 | 8.84±2.15 | 9.51±2.77 |
| **Total** | 781 | 55.09±9.22 | 23.08±5.46 | 17.64±4.92 | 14.38±3.06 | 67.64±12.84 | 22.17±5.52 | 26.67±5.29 | 9.22±2.17 | 9.58±2.78 |
| **Test** | | **F=5.962479 p=.003** | **F=27.187113 p=.001** | **F=8.414393 p=.001** | **F=11.447048 p=.001** | **F=55.937945 p=.001** | **F=64.494789 p=.001** | **F=45.443358 p=.001** | **F=25.034920 p=.001** | **F=12.155353 p=.001** |
